# Supplementary material for: Micellar charge induced emissive response of a bio-active 3-pyrazolyl-2-pyrazoline derivative: a spectroscopic and quantum chemical analysis
Source: Royal Society of Chemistry journal article supplement (doi:10.1039/c4ra06497f), 2014-01-01

***Micellar charge induced emissive response of a bio-active 3-pyrazolyl-2-pyrazoline derivative: A Spectroscopic and Quantum Chemical analysis***

**Arindam Sarkar <sup>a</sup>, Soumyadipta Rakshit <sup>a</sup>, Sayantani Chall <sup>a</sup>, Soumya Sundar Mati <sup>a</sup>, Dipti Singharoy <sup>a</sup>, Jorge Bañuelos <sup>b</sup>, Iñigo López Arbeloa <sup>b</sup>  
and Subhash Chandra Bhattacharya<sup>\*a</sup>**

\* <sup>a</sup>Department of Chemistry, Jadavpur University, Kolkata – 700032, India.

\* <sup>a</sup>E-mail : [sbjuchem@yahoo.com](mailto:sbjuchem@yahoo.com) / [scbhattacharyya@chemistry.jdvu.ac.in](mailto:scbhattacharyya@chemistry.jdvu.ac.in)

\* <sup>a</sup>Phone No: 033 2414 6223; Fax: 91(033) 24146584

<sup>b</sup>Departamento de Química Física, Facultad de Ciencias y Tecnología  
Universidad del País Vasco-EHU Apartado 644, 48080-Bilbao, Spain

**Supporting Information**

## Figures:

**Figure S1: Binding constant plots of different PYZ-micelle systems**

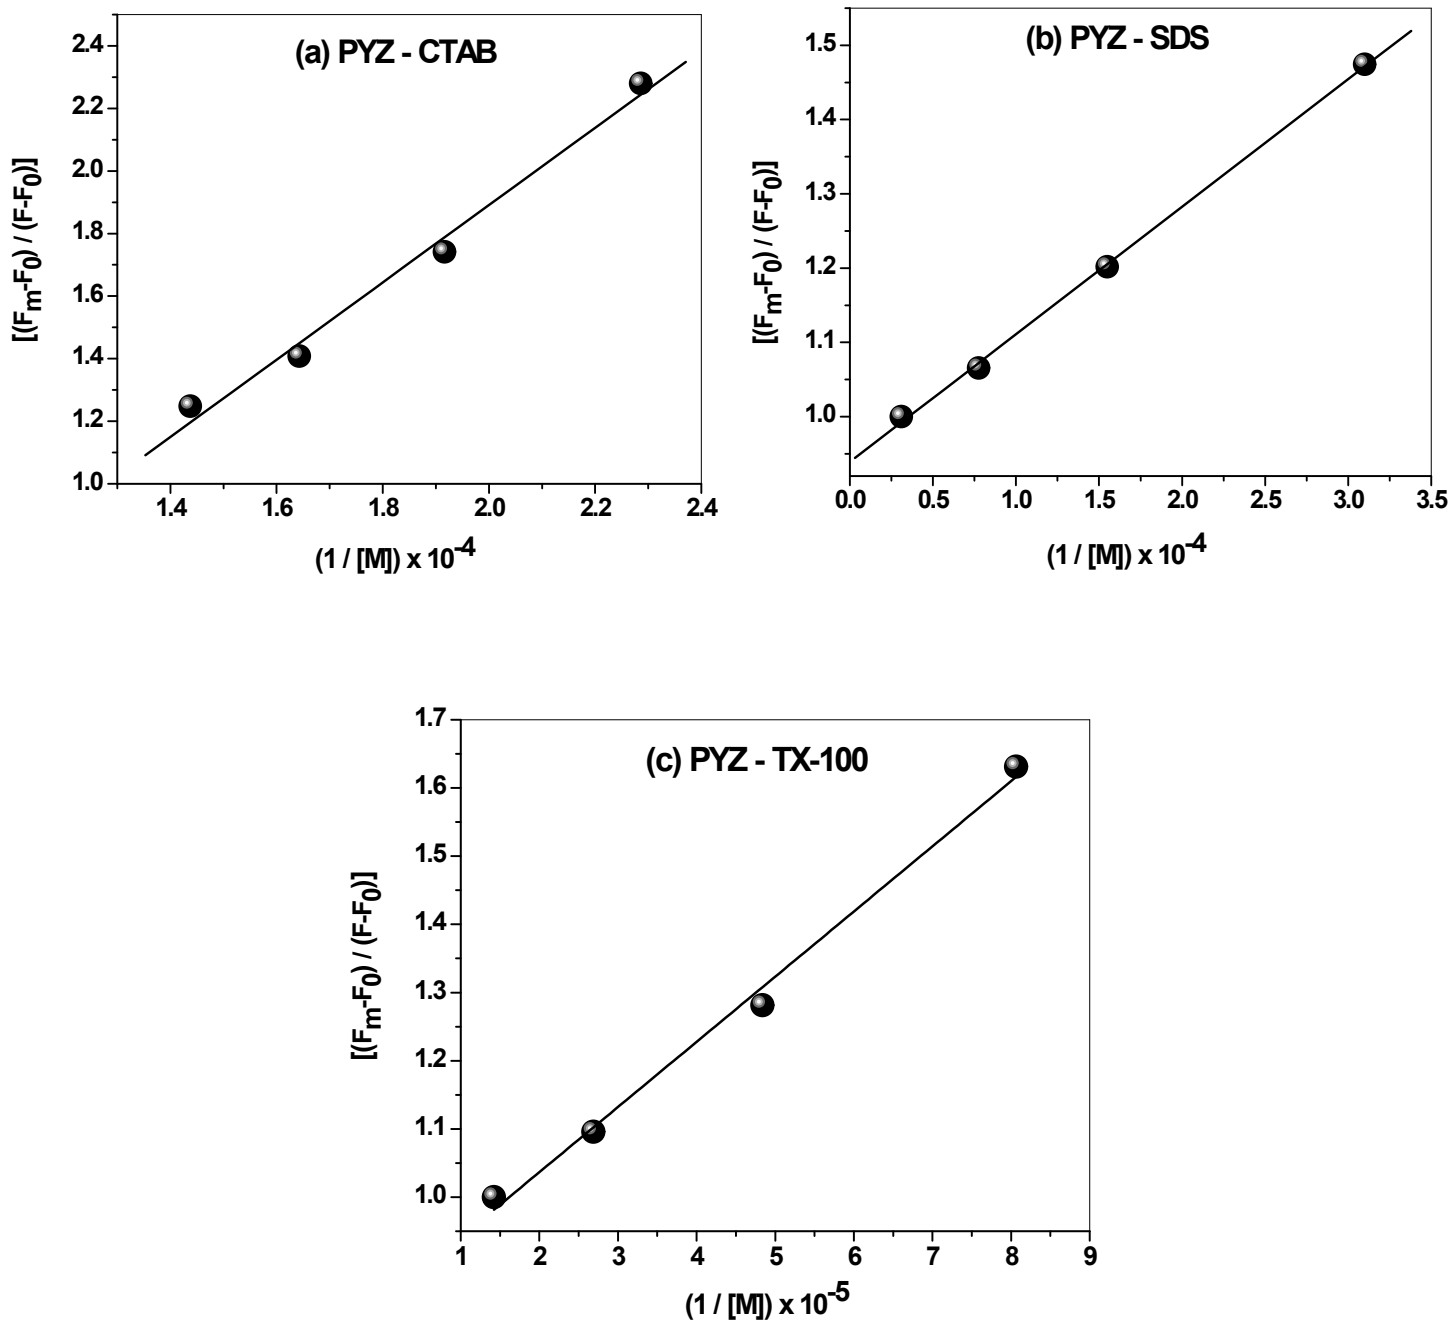

**Figure S2:** TD-DFT / B3LYP / 6-31G (d, p) calculated normalized absorption spectrum of PYZ in different micellar environments

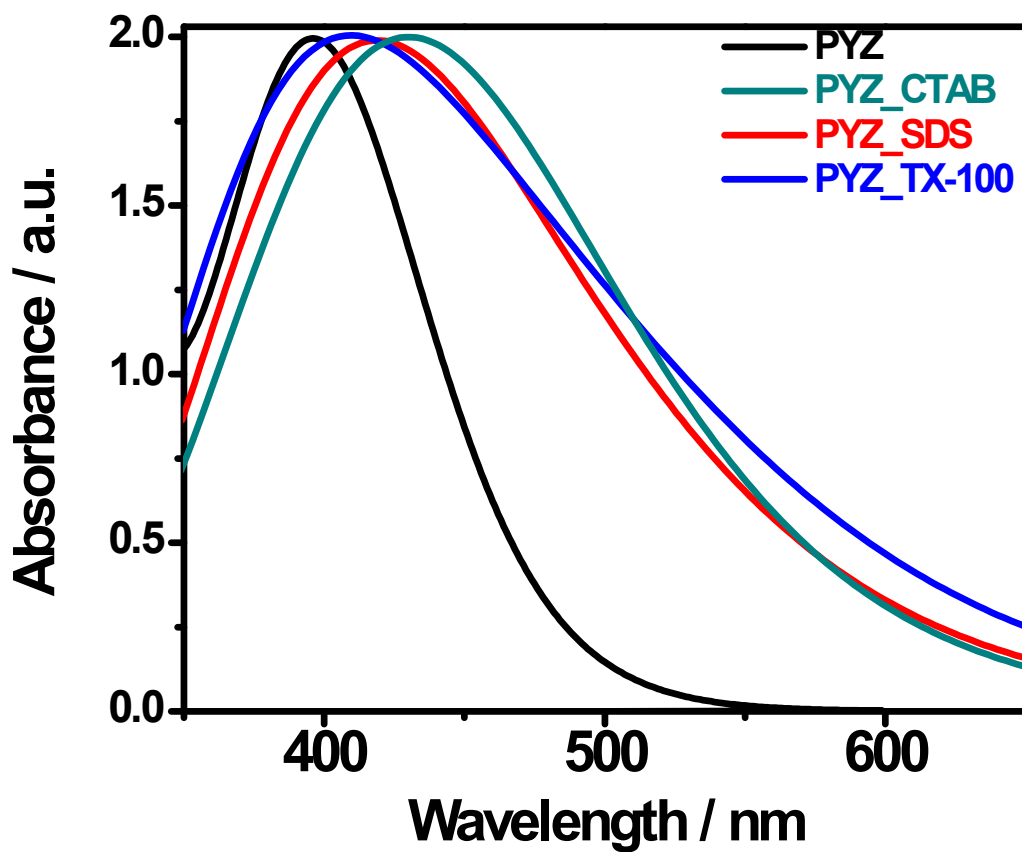

**Figure S3(a): MO diagrams of PYZ (ground state), PYZ\*(excited state) in CTAB micellar media along with their corresponding energy values calculated by**

**TD-DFT / B3LYP / 6-31G (d, p) method**

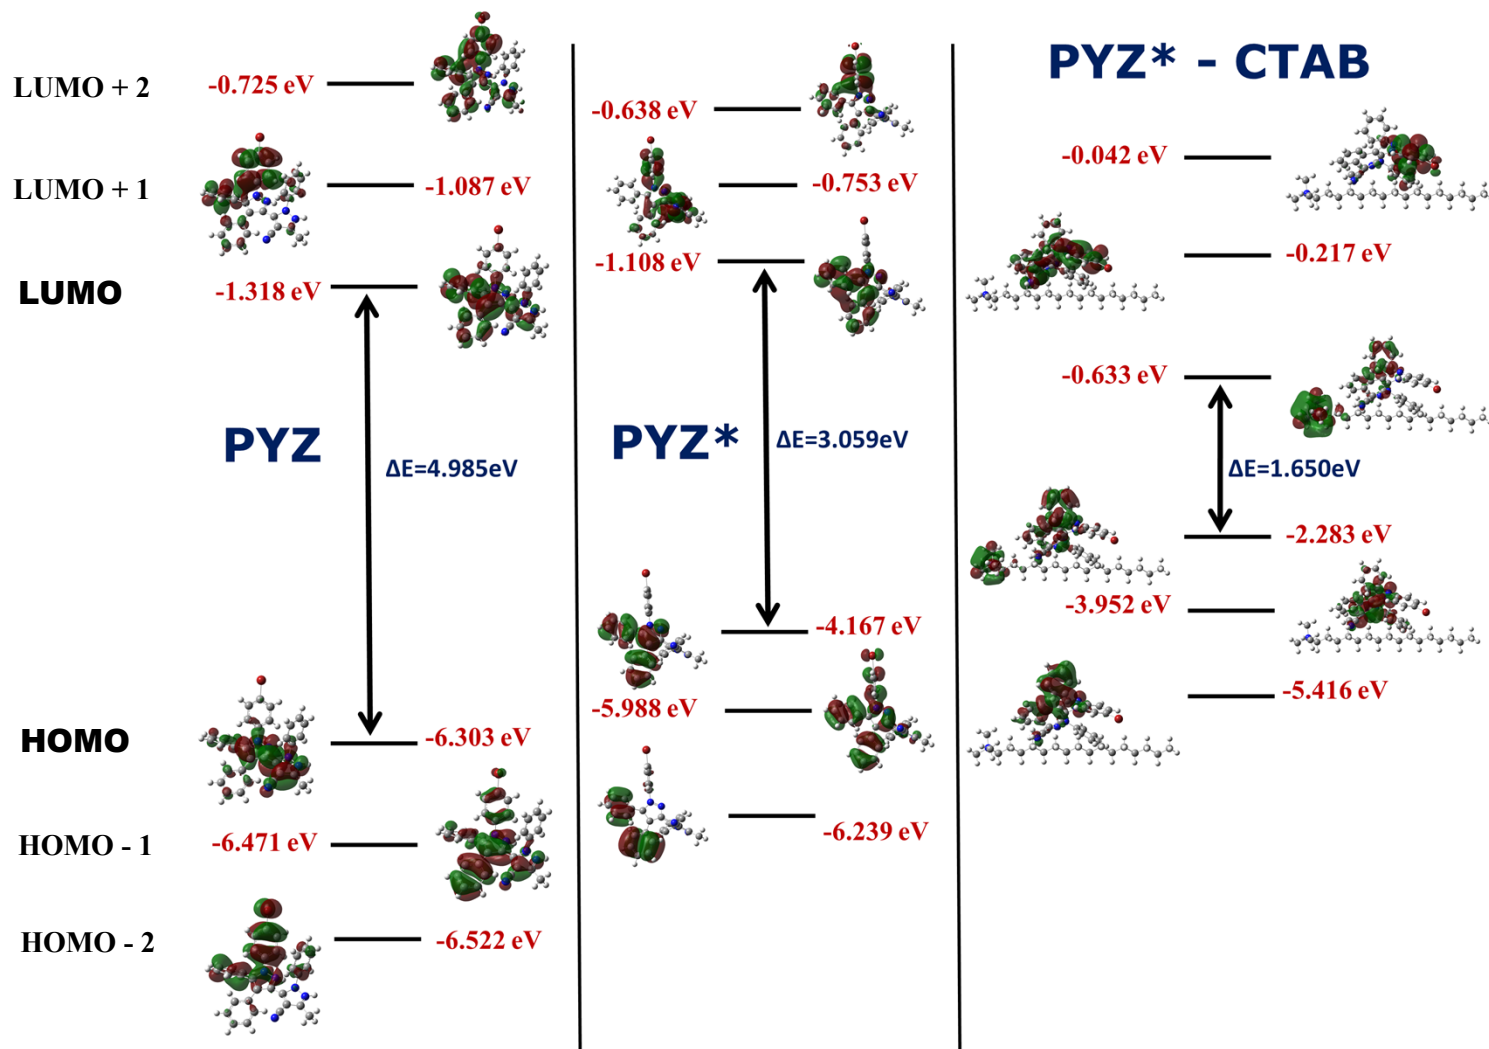

**Figure S3(b): MO diagrams of PYZ\* in TX-100 and TX-100-CpCl media along with their corresponding energy values calculated by**

**TD-DFT / B3LYP / 6-31G (d, p) method**

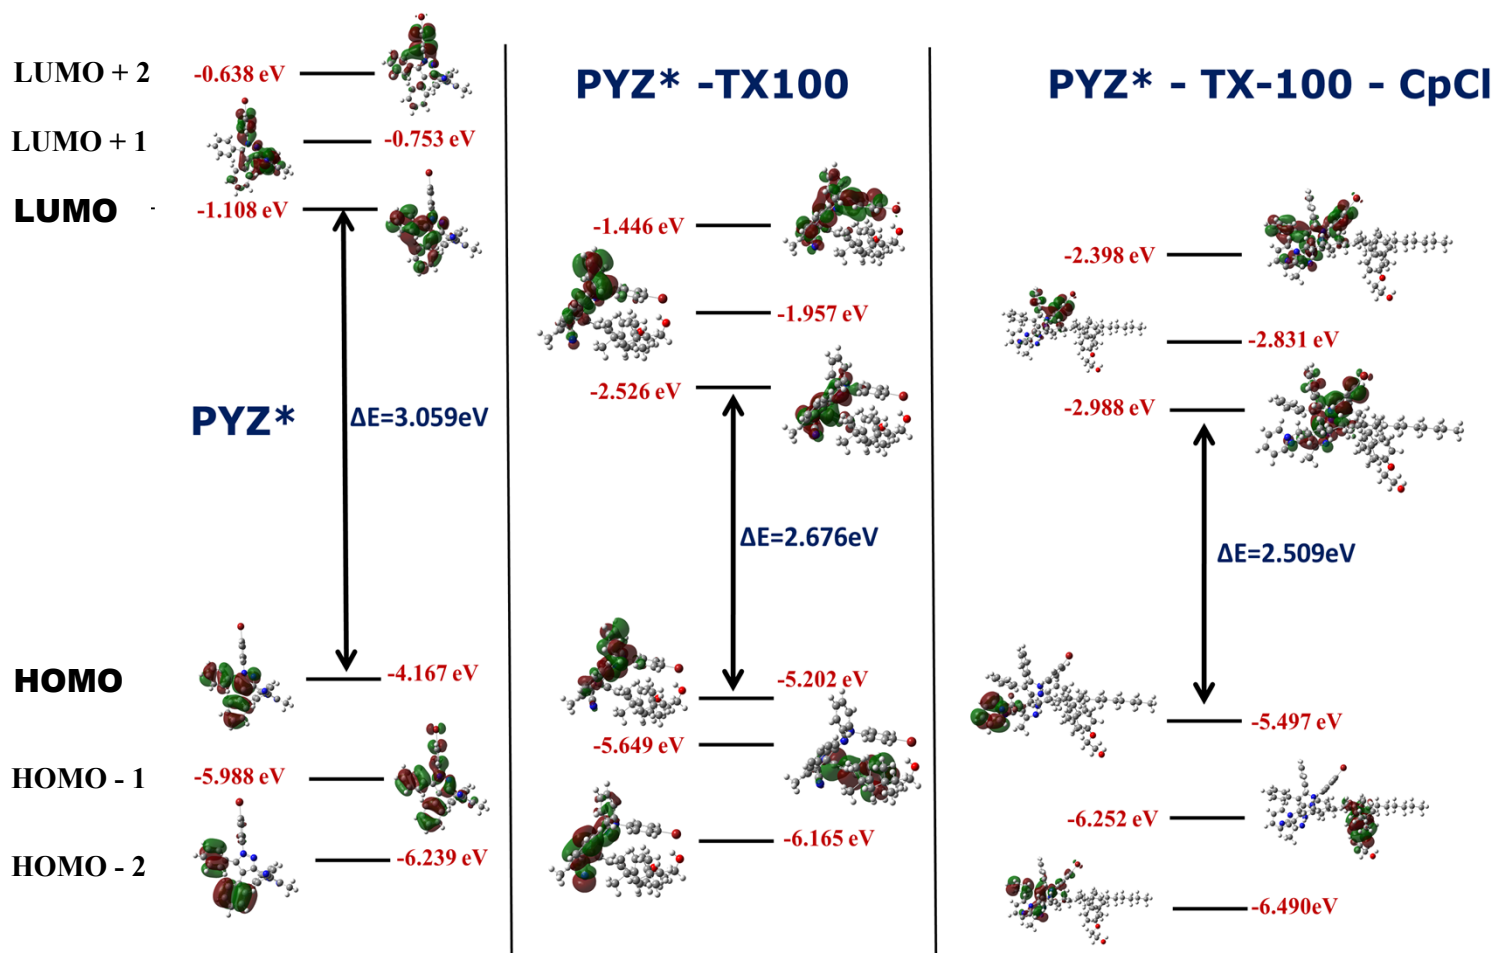

Supplement: c4ra06497f1.pdf [file c4ra06497f1.pdf]
